# Supplementary material for: Purification method dependent fluorescence from nitrogen-vacancy (NV) centers of nano-diamonds
Source: Royal Society of Chemistry journal article supplement (doi:10.1039/c6ra01510g), 2016-01-01
Supplement: c6ra01510g1.pdf [file c6ra01510g1.pdf]

## Supplementary Information

### Purification Method Dependent Fluorescence from Nitrogen-vacancy (NV) Centers of Nano-diamonds

Ravi Kumar<sup>a</sup>, S. J. Yoon<sup>b</sup>, K. G. Lee<sup>b</sup>, Prabir Pal<sup>a</sup>, R. P. Pant<sup>a</sup>, C. K. Suman<sup>a</sup>, S. R. Dhakate<sup>a</sup>, Raj Kumar<sup>c</sup>, Devesh K. Avasthi<sup>c,d</sup>, Dilip K. Singh<sup>a†</sup>

<sup>a</sup>CSIR-National Physical Laboratory, New Delhi-110012, India

<sup>b</sup>Department of Physics, Hanyang University, Seoul-133-791, Rep. of Korea

<sup>c</sup>Inter University Accelerator Centre, Aruna Asaf Ali Marg, New Delhi-110067, India

<sup>d</sup>Amity Institute of Nanotechnology, Amity University, Noida-201313, India

---

†Corresponding author Tel.: +91-11-4560-8404

Email: [dilip@mail.nplindia.org](mailto:dilip@mail.nplindia.org)

**Estimation of Inter-planar lattice spacing (d) from selected area electron diffraction (SAED) pattern**

For ND0, diffraction spots and rings are observed at inter-planar spacing (plane) of 0.113 nm (220), 0.063 nm (400) and 0.052 (unassigned plane) of diamond. The observed inter-planar spacing is lower than the standard inter-planar spacing of bulk diamond (PCPDF No. # 060675: 0.206 nm (111), 0.126 nm (220) and 0.890 nm (400)). This indicates presence of compressive strain in the initial sample grown by HPHT. After purification sample ND35-R8HCL shows diffraction rings at 0.231 (111), 0.143 (220) and at 0.123 (220) lattice planes respectively, see inset of Fig. 1(c). For ND35-OXDHCL the SAED patterns are observed at 0.22 nm (111) plane and 0.138 nm (220).

**Scanning Electron Microscopy (SEM)**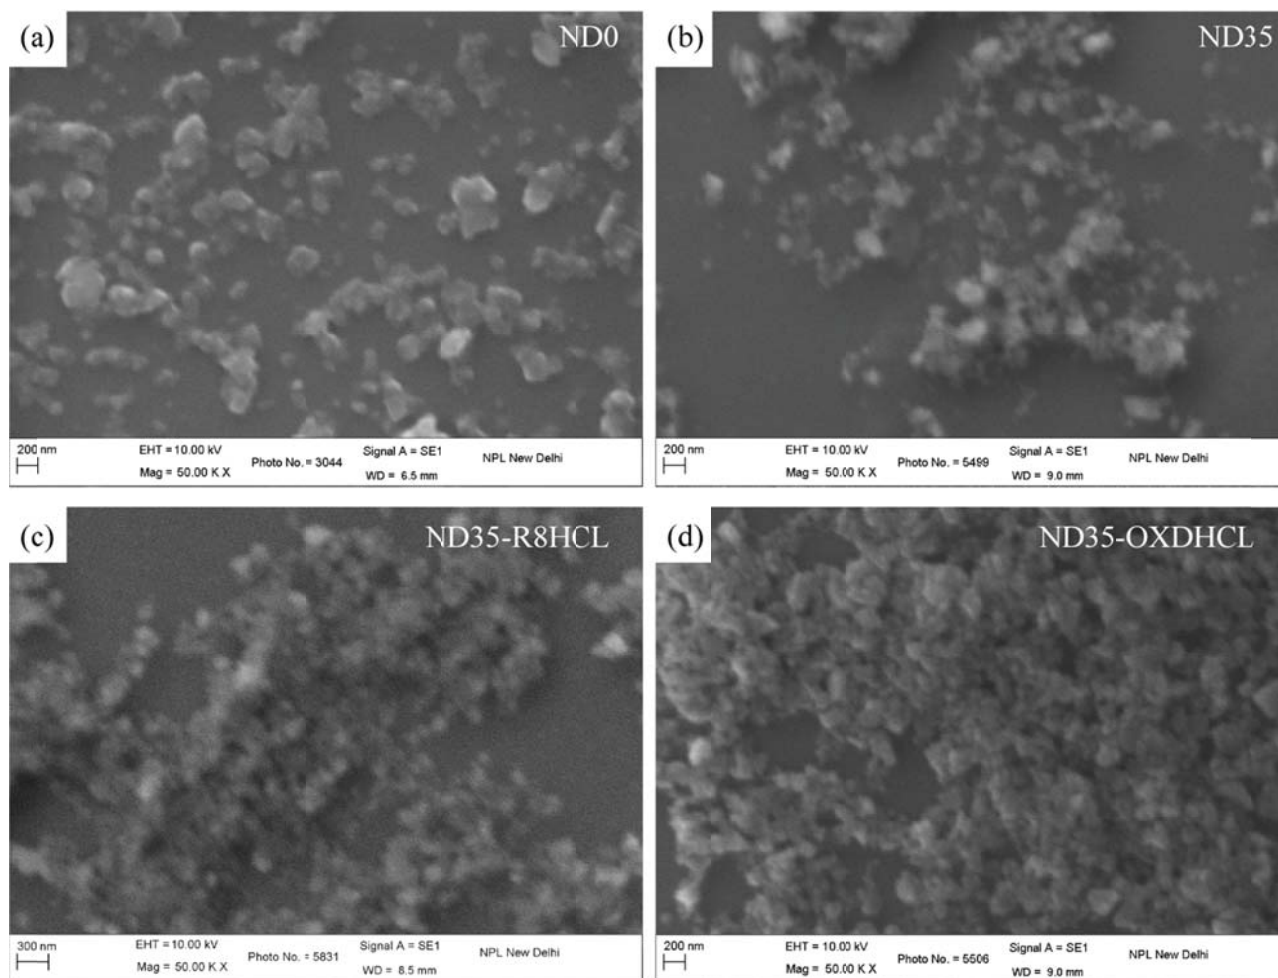

**Fig. S1** SEM micrographs of initial sample (ND0), milled sample (ND35), sample purified through acid reflux (ND35-R8HCL) and sample purified through air oxidation (ND35-OXDHCL). Sample purified through wet chemical route shows smaller size than the sample purified through air oxidation.

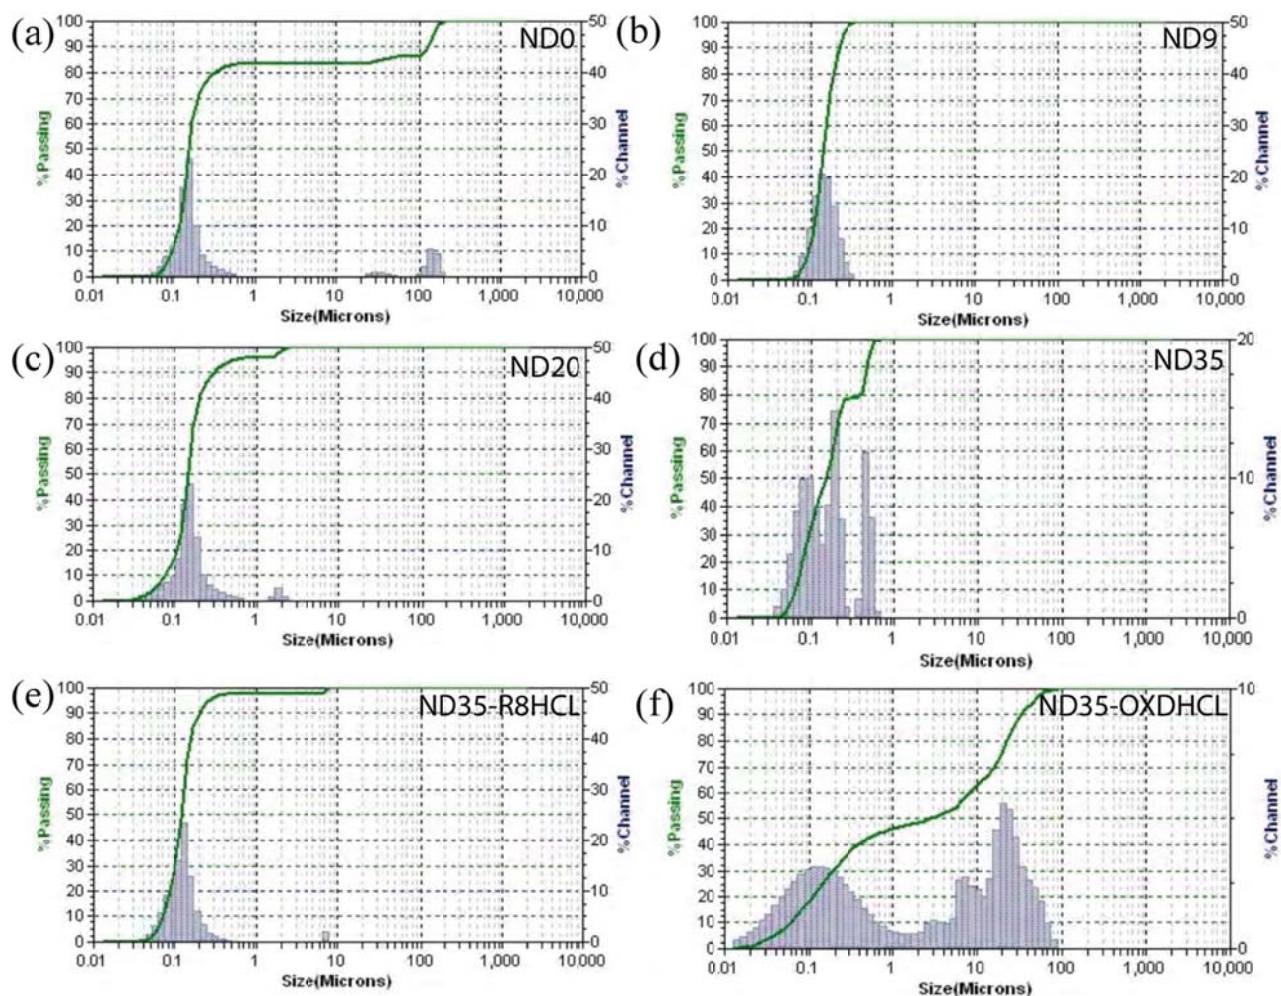

**Fig. S2** Particle size distribution histogram obtained from Dynamic light scattering measurements for (a) Initial sample: ND0; Milled samples (b) ND9, (c) ND-20, (d) ND-35, Purified samples (e) ND35-R8HCL and (f) ND35-OXDHCL.

**Table-SI:** XRD line-profile of milled, purified and irradiated nano-diamond samples.

| Peak Profile                                                                  | Peak1                    | Peak2                     | Crystallite size (Peak1) | Crystallite (Peak 2) |
|-------------------------------------------------------------------------------|--------------------------|---------------------------|--------------------------|----------------------|
| <b>ND0</b><br><i>Center (deg)</i><br><i>FWHM(deg)</i><br><i>Ampl.</i>         | 43.703<br>0.524<br>636.7 | 43.888<br>0.335<br>1657.9 | 16.3                     | 25.5                 |
| <b>ND3</b><br><i>Center (deg)</i><br><i>FWHM(deg)</i><br><i>Ampl.</i>         | 43.667<br>0.659<br>660.9 | 43.766<br>0.286<br>1185.9 | 13.0                     | 29.9                 |
| <b>ND6</b><br><i>Center (deg)</i><br><i>FWHM(deg)</i><br><i>Ampl.</i>         | 43.541<br>0.517<br>152.7 | 43.791<br>0.338<br>757.8  | 16.5                     | 25.3                 |
| <b>ND9</b><br><i>Center (rad)</i><br><i>FWHM(rad)</i><br><i>Ampl.</i>         | 43.555<br>0.557<br>213.1 | 43.811<br>0.340<br>1011.5 | 15.3                     | 25.1                 |
| <b>ND15</b><br><i>Center (deg)</i><br><i>FWHM(deg)</i><br><i>Ampl.</i>        | 43.654<br>0.309<br>73.4  | -                         | -                        | 27.7                 |
| <b>ND20</b><br><i>Center (deg)</i><br><i>FWHM(deg)</i><br><i>Ampl.</i>        | 43.775<br>0.338<br>88.4  | -                         | -                        | 25.3                 |
| <b>ND35</b><br><i>Center (deg)</i><br><i>FWHM(deg)</i><br><i>Ampl.</i>        | 43.932<br>0.370<br>65.6  | -                         | -                        | 23.2                 |
| <b>ND35-R8HCl</b><br><i>Center (deg)</i><br><i>FWHM(deg)</i><br><i>Ampl.</i>  | 43.364<br>0.457<br>38.1  | 43.724<br>0.332<br>352.4  | 18.7                     | 25.8                 |
| <b>ND35-OXDHCl</b><br><i>Center (deg)</i><br><i>FWHM(deg)</i><br><i>Ampl.</i> | 43.383<br>0.455<br>44.1  | 43.710<br>0.310<br>349.4  | 18.8                     | 27.4                 |

Table-SII: Raman peak summary

| Sample             |                             | Peak1    | Peak2   | Peak3          | Peak4    | Peak5    | Peak6  | Peak7          |
|--------------------|-----------------------------|----------|---------|----------------|----------|----------|--------|----------------|
| ND0                | Center ( $\text{cm}^{-1}$ ) | 1331.8   | 1351.5  | 1482.3         | 1578.7   | 1615.7   | 1688.2 |                |
|                    | FWHM ( $\text{cm}^{-1}$ )   | 5.9      | 62.3    | 15.6           | 83.5     | 22.6     | 20.7   |                |
|                    | Ampl.                       | 7154.0   | 1545.4  | 213.1          | 3155.3   | 466.9    | 267.3  |                |
|                    | Area                        | 63770    | 108338  | 4077           | 340281   | 11229    | 7423   |                |
|                    | % Content                   | 12.4     | 21.2    |                | 66.4     |          |        |                |
| ND9                | Center ( $\text{cm}^{-1}$ ) | 1330.8   | 1350.8  |                | 1583.4   | 1614.9   | 1704.4 | 1798.1         |
|                    | FWHM ( $\text{cm}^{-1}$ )   | 6.17     | 53.0    |                | 80.2     | 21.8     | 59.0   | 66.7           |
|                    | Ampl.                       | 17940.9  | 3431.4  |                | 4921.6   | 795.0    | 968.3  | 2125.1         |
|                    | Area                        | 168099   | 221103  |                | 519696   | 26083    | 77703  | 109067         |
|                    | % Content                   | 18.5     | 24.3    |                | 57.2     |          |        |                |
| ND20               | Center ( $\text{cm}^{-1}$ ) | 1332.5   | 1354.1  | 1472.9         | 1584.4   | 1619.9   |        |                |
|                    | FWHM ( $\text{cm}^{-1}$ )   | 5.1      | 62.3    | 40.0           | 75.5     | 24.9     |        |                |
|                    | Ampl.                       | 8381.8   | 1455.4  | 283.7          | 1886.5   | 389.9    |        |                |
|                    | Area                        | 65322    | 101288  | 13900          | 180071   | 14005    |        |                |
|                    | % Content                   | 18.8     | 29.2    |                | 51.9     |          |        |                |
| ND35               | Center ( $\text{cm}^{-1}$ ) | 1331.5   | 1354.9  |                | 1586.8   | 1618.2   | 1737.8 |                |
|                    | FWHM ( $\text{cm}^{-1}$ )   | 5.4      | 41.0    |                | 78.7     | 18.2     | 188.6  |                |
|                    | Ampl.                       | 5438.7   | 1208.4  |                | 1662.7   | 385.2    | 2074.8 |                |
|                    | Area                        | 44902    | 65447   |                | 167108   | 10518    | 271365 |                |
|                    | % Content                   | 16.2     | 23.6    |                | 60.2     |          |        |                |
| ND35-R8HCL         | Center ( $\text{cm}^{-1}$ ) | 1332.7   | 1340.9  | 1461.6         | 1569.5   |          |        | 1227.1         |
|                    | FWHM ( $\text{cm}^{-1}$ )   | 5.1      | 74.0    | 107.7          | 80.9     |          |        | 54.7           |
|                    | Ampl.                       | 34947.3  | 2972.9  | 2747.4         | 3937.9   |          |        | 1779.4         |
|                    | Area                        | 277912   | 310740  | 401831         | 427637   |          |        | 129470         |
|                    | % Content                   | 27.3     | 30.6    |                | 42.1     |          |        |                |
| ND35-OXDHCL        | Center ( $\text{cm}^{-1}$ ) | 1332.3   | 1344.3  |                | 1576.1   |          |        |                |
|                    | FWHM ( $\text{cm}^{-1}$ )   | 4.7      | 65.0    |                | 70.2     |          |        |                |
|                    | Ampl.                       | 73315.1  | 2374.8  |                | 1853.9   |          |        |                |
|                    | Area                        | 542284   | 218668  |                | 182997   |          |        |                |
|                    | % Content                   | 57.4     | 23.2    |                | 19.4     |          |        |                |
| ND0-IRR            | Center ( $\text{cm}^{-1}$ ) | 1331.9   | 1338.6  | 1368.9         | 1579.6   | 1608.6   |        |                |
|                    | FWHM ( $\text{cm}^{-1}$ )   | 3.5      | 86.5    | 4.04           | 63.5     | 41.3     |        |                |
|                    | Ampl.                       | 1371.1   | 10310.0 | 3155.5         | 6313.9   | 7291.9   |        |                |
|                    | Area                        | 7466     | 1237256 | 199958.8       | 426512.7 | 320858.5 |        |                |
|                    | % Content                   | 0.4      | 66.1    | 10.7           | 22.8     |          |        |                |
| ND35- R8<br>HCLIRR | Center( $\text{cm}^{-1}$ )  | 1332.5   | 1340.5  | 1494.1         | 1595.9   | 1690.9   |        |                |
|                    | FWHM ( $\text{cm}^{-1}$ )   | 5.8      | 73.7    | 87.2           | 32.9     | 23.2     |        |                |
|                    | Ampl.                       | 3423.6   | 15939.1 | 7378.5         | 14838.05 | 3223.7   |        |                |
|                    | Area                        | 21256    | 3342994 | 1761906        | 1225006  | 217282   |        |                |
|                    | % Content                   | 0.5      | 72.8    |                | 26.7     |          |        |                |
| ND35-OXD<br>HCLIRR | Center ( $\text{cm}^{-1}$ ) | 1331.6   | 1345.7  | 1479.6         | 1580.3   |          |        |                |
|                    | FWHM ( $\text{cm}^{-1}$ )   | 4.64     | 55.6    | 71.4           | 70.46    |          |        |                |
|                    | Ampl.                       | 19380.05 | 5159.2  | 2451.9         | 7719.2   |          |        |                |
|                    | Area                        | 139895   | 402604  | 247595         | 578979   |          |        |                |
|                    | % Content                   | 12.5     | 35.9    |                | 51.6     |          |        |                |
| Assignment         |                             | D-band   |         | Poly-acetylene | G-band   | D'-band  | M      | M <sup>+</sup> |

**Table-SIII** Shows the fitted XPS C 1s core peaks for the different Nano diamond samples.

| Sample Name           | Peak1  | Peak2  | Peak3                                | Peak4 | Peak5 | Peak6 |
|-----------------------|--------|--------|--------------------------------------|-------|-------|-------|
| <b>ND0</b>            |        |        |                                      |       |       |       |
| Center(eV)            | 286.2  | 286.9  |                                      |       |       |       |
| Area                  | 5673.6 | 1419.1 |                                      |       |       |       |
| FWHM (eV)             | 11.5   | 3.1    |                                      |       |       |       |
| % Content             | 79.9   | 20.0   |                                      |       |       |       |
| <b>ND35</b>           |        |        |                                      |       |       |       |
| Center(eV)            | 285.2  | 285.7  |                                      |       |       |       |
| Area                  | 3970.3 | 975.7  |                                      |       |       |       |
| FWHM (eV)             | 1.2    | 2.7    |                                      |       |       |       |
| % Content             | 80.2   | 19.8   |                                      |       |       |       |
| <b>ND35-R8HCL</b>     |        |        |                                      |       |       |       |
| Center(eV)            | 285.0  | 286.2  | 288.8                                | 288.8 | 294.4 | 297.0 |
| Area                  | 688.3  | 456.3  | 695.5                                | 695.5 | 73.8  | 30.9  |
| FWHM (eV)             | 1.5    | 1.8    | 6.9                                  | 6.9   | 1.7   | 1.5   |
| % Content             | 26.1   | 17.3   | 26.3                                 | 26.3  | 2.8   | 1.2   |
| <b>ND35-OXYHCL</b>    |        |        |                                      |       |       |       |
| Center(eV)            | 284.9  | 286.5  | 291.1                                | 293.7 |       |       |
| Area                  | 1583.3 | 289.8  | 140.6                                | 35.5  |       |       |
| FWHM (eV)             | 1.6    | 2.3    | 9.3                                  | 1.8   |       |       |
| % Content             | 77.3   | 14.2   | 6.9                                  | 1.7   |       |       |
| <b>ND0-IRR</b>        |        |        |                                      |       |       |       |
| Center(eV)            | 285.3  | 286.5  |                                      |       |       |       |
| Area                  | 4441.4 | 2462.5 |                                      |       |       |       |
| FWHM (eV)             | 1.3    | 2.6    |                                      |       |       |       |
| % Content             | 64.3   | 35.7   |                                      |       |       |       |
| <b>ND35-R8HCLIRR</b>  |        |        |                                      |       |       |       |
| Center(eV)            | 285.4  | 285.9  |                                      | 293.7 |       |       |
| Area                  | 4729.6 | 1505.9 |                                      | 288.4 |       |       |
| FWHM (eV)             | 1.2    | 2.4    |                                      | 12.8  |       |       |
| % Content             | 72.4   | 23.1   |                                      | 4.4   |       |       |
| <b>ND35-OXYHCLIRR</b> |        |        |                                      |       |       |       |
| Center(eV)            | 288.7  | 288.9  |                                      | 290.4 |       |       |
| Area                  | 1015.9 | 344.1  |                                      | 4718  |       |       |
| FWHM (eV)             | 4.7    | 1.3    |                                      | 1.4   |       |       |
| % Content             | 16.7   | 5.6    |                                      | 77.6  |       |       |
| Assignment            | $sp^2$ | $sp^3$ | <i>R-OH, RC(=O)R', R-COOH groups</i> |       |       |       |

**Table-SIV** Shows the fitted XPS C1s core plasmon peaks for the different Nano diamond samples.

| Sample Name           | Peak1  | Peak2  | Peak3  | Peak4  | Peak5  | Peak6  | Peak7  |
|-----------------------|--------|--------|--------|--------|--------|--------|--------|
| <b>ND0</b>            |        |        |        |        |        |        |        |
| Center(eV)            |        |        |        |        | 313.0  | 321.0  | 340.1  |
| Area                  |        |        |        |        | 2643.4 | 1096.8 | 3289.4 |
| FWHM(eV)              |        |        |        |        | 20.3   | 9.0    | 48.6   |
| <b>ND35</b>           |        |        |        |        |        |        |        |
| Center(eV)            |        |        |        |        | 309.0  | 319.5  | 348.1  |
| Area                  |        |        |        |        | 1175.1 | 1716.5 | 919.3  |
| FWHM(eV)              |        |        |        |        | 11.1   | 11.0   | 19.6   |
| <b>ND35-R8HCL</b>     |        |        |        |        |        |        |        |
| Center(eV)            | 306.3  |        | 347.6  | 351.1  | 356.1  | 368.5  | 374.4  |
| Area                  | 277.5  |        | 10364  | 943.0  | 588.2  | 91.3   | 21.1   |
| FWHM(eV)              | 2.7    |        | 1.7    | 1.9    | 10.5   | 1.8    | 0.7    |
| <b>ND35-OXYHCL</b>    |        |        |        |        |        |        |        |
| Center(eV)            | 307.6  | 318.9  | 347.5  | 351.0  |        | 368.3  | 374.2  |
| Area                  | 334.2  | 530.5  | 89.1   | 109.5  |        | 44.1   | 18.8   |
| FWHM(eV)              | 9.4    | 12.4   | 1.7    | 2.6    |        | 1.0    | 0.8    |
| <b>ND0-IRR</b>        |        |        |        |        |        |        |        |
| Center(eV)            |        | 315.9  | 320.5  |        |        |        |        |
| Area                  |        | 4248.4 | 590.3  |        |        |        |        |
| FWHM(eV)              |        | 23.9   | 7.3    |        |        |        |        |
| <b>ND35-R8HCLIRR</b>  |        |        |        |        |        |        |        |
| Center(eV)            | 309.6  |        | 320.3  | 348.0  |        |        |        |
| Area                  | 1675.3 |        | 2054.6 | 2821.1 |        |        |        |
| FWHM(eV)              | 13.5   |        | 10.7   | 36.4   |        |        |        |
| <b>ND35-OXYHCLIRR</b> |        |        |        |        |        |        |        |
| Center(eV)            | 314.0  | 324.8  | 351.7  |        |        |        |        |
| Area                  | 1339.5 | 1849.6 | 1081   |        |        |        |        |
| FWHM(eV)              | 13.7   | 11.1   | 22.3   |        |        |        |        |

**Table-SV** Shows the XPS fitted peaks for the Nitrogen 1s and Oxygen 1s core of different Nano-diamond samples.

| Sample Name           | Peak1      | Peak2       | Peak3            | Peak4  | Peak5  | Peak6 | Peak7 |  |
|-----------------------|------------|-------------|------------------|--------|--------|-------|-------|--|
| <b>ND0</b>            | Center(eV) | 400.1       | 531.4            | 533.6  |        | 536.3 |       |  |
|                       | Area       | 22.3        | 116.5            | 713.2  |        | 98.7  |       |  |
|                       | FWHM(eV)   | 2.3         | 1.7              | 2.7    |        | 5.0   |       |  |
| <b>ND35</b>           | Center(eV) |             | 530.8            | 532.2  | 530.2  |       |       |  |
|                       | Area       |             | 788.5            | 1045.7 | 296.1  |       |       |  |
|                       | FWHM(eV)   |             | 1.6              | 2.1    | 0.9    |       |       |  |
| <b>ND35-R8HCL</b>     | Center(eV) |             | 531.0            | 532.5  |        |       |       |  |
|                       | Area       |             | 2358.7           | 1270.0 |        |       |       |  |
|                       | FWHM(eV)   |             | 1.8              | 1.9    |        |       |       |  |
| <b>ND35-OXYHCL</b>    | Center(eV) |             | 531.4            | 533.8  | 530.7  |       |       |  |
|                       | Area       |             | 1219.0           | 134.5  | 1908.8 |       |       |  |
|                       | FWHM(eV)   |             | 2.5              | 1.6    | 1.3    |       |       |  |
| <b>ND0-IRR</b>        | Center(eV) |             | 531.6            | 533.1  |        |       | 555.3 |  |
|                       | Area       |             | 62.5             | 818.2  |        |       | 179.1 |  |
|                       | FWHM(eV)   |             | 1.8              | 2.0    |        |       | 14.7  |  |
| <b>ND35-R8HCLIRR</b>  | Center(eV) |             | 531.8            | 533.5  |        |       | 556.2 |  |
|                       | Area       |             | 138.5            | 1247.9 |        |       | 245.1 |  |
|                       | FWHM(eV)   |             | 2.1              | 2.0    |        |       | 11.5  |  |
| <b>ND35-OXYHCLIRR</b> | Center(eV) | 405.1       | 531.5            | 533.5  |        | 536.3 | 538.0 |  |
|                       | Area       | 14.5        | 102.6            | 323.7  |        | 152.3 | 463.1 |  |
|                       | FWHM(eV)   | 3.4         | 1.6              | 1.9    |        | 2.1   | 2.1   |  |
| <b>Assignment</b>     |            | <i>N 1s</i> | <i>O 1s core</i> |        |        |       |       |  |



**Table-SVI** shows the XPS core area and the atomic percentage for the different elements present at surface (within XPS probing depth).

| Sample name           | Area      |           |           | At. Conc. (%) |        |          |
|-----------------------|-----------|-----------|-----------|---------------|--------|----------|
|                       | C 1s core | O 1s core | N 1s core | Carbon        | Oxygen | Nitrogen |
| <b>ND0</b>            | 7092.7    | 928.7     | 22.3      | 95.7          | 4.1    | 0.2      |
| <b>ND35</b>           | 4946.0    | 2130.3    | -         | 87.5          | 12.5   | -        |
| <b>ND35-R8HCL</b>     | 1944.8    | 3628.7    | -         | 61.9          | 38.1   | -        |
| <b>ND35-OXYHCL</b>    | 2049.2    | 3262.3    | -         | 65.5          | 34.5   | -        |
| <b>ND0-IRR</b>        | 6903.9    | 1059.8    | -         | 95.2          | 4.8    | -        |
| <b>ND35-R8HCLIRR</b>  | 6523.9    | 1631.5    | -         | 92.4          | 7.6    | -        |
| <b>ND35-OXYHCLIRR</b> | 6078.0    | 1041.7    | 14.5      | 94.5          | 5.3    | 0.1      |

**Table-SVII:** Photoluminescence spectra fitted with Gaussian line-shapes.

| Sample                | Peak1         | Peak2         | Peak3                 | Peak4      | Peak5     | Peak6                        | Peak7   | Peak8  |
|-----------------------|---------------|---------------|-----------------------|------------|-----------|------------------------------|---------|--------|
| <b>ND0</b>            |               |               |                       |            |           |                              |         |        |
| Center (nm)           | 552           | 559           |                       | 627        |           |                              | 666     | 700    |
| FWHM(nm)              | 9.2           | 4.7           | -                     | 122.4      |           | -                            | 40.0    | 63.1   |
| Ampl.                 | 201           | 199           |                       | 3647       |           |                              | 516     | 1623   |
| <b>ND35</b>           |               |               |                       |            |           |                              |         |        |
| Center (nm)           | 552           | 558           | 559                   | 609        |           |                              | 667     | 707    |
| FWHM(nm)              | 2.6           | 40.7          | 4.4                   | 73.2       | -         | -                            | 63.8    | 61.2   |
| Ampl.                 | 74            | 157           | 59.2                  | 921        |           |                              | 884     | 520    |
| <b>ND35-R8HCL</b>     |               |               |                       |            |           |                              |         |        |
| Center (nm)           |               | 569           |                       | 608        |           | 662                          |         |        |
| FWHM(nm)              | -             | 63.4          | -                     | 53.2       | -         | 96.2                         | -       | -      |
| Ampl.                 |               | 1566          |                       | 1583       |           | 3650                         |         |        |
| <b>ND35-OXDHCL</b>    |               |               |                       |            |           |                              |         |        |
| Center (nm)           | 551           |               | 575                   | 602        | 638       | 659                          |         | 683    |
| FWHM(nm)              | 0.2           | -             | 4.0                   | 74.8       | 6.5       | 18.3                         | -       | 82.9   |
| Ampl.                 | 509           |               | 51.3                  | 418        | 126       | 134                          |         | 1444   |
| <b>ND0-IRR</b>        |               |               |                       |            |           |                              |         |        |
| Center (nm)           | 552           | 559           | 576                   | 605        |           | 655                          |         | 695    |
| FWHM(nm)              | 6.4           | 2.9           | 7.9                   | 68.1       |           | 58.7                         | -       | 62.8   |
| Ampl.                 | 742           | 776           | 1099                  | 13118      |           | 17395-                       |         | 19432  |
| <b>ND35-R8HCLIRR</b>  |               |               |                       |            |           |                              |         |        |
| Center (nm)           | 552           | 559           | 575                   | 605        | 638       | 658                          | 660     | 698    |
| FWHM(nm)              | 2.5           | 1.3           | 6.4                   | 64.6       | 5.4       | 8.6                          | 57.6    | 61.4   |
| Ampl.                 | 408           | 285           | 4818                  | 17468      | 3235      | 1838                         | 22019   | 20699  |
| <b>ND35-OXDHCLIRR</b> |               |               |                       |            |           |                              |         |        |
| Center (nm)           |               |               | 575.1                 | 600.8      | 637.8     | 658.6                        | 675.6   | 715.8  |
| FWHM(nm)              |               |               | 5.02                  | 63.8       | 4.95      | 9.17                         | 80.7    | 32.8   |
| Ampl.                 |               |               | 3186.6                | 12267.8    | 3920.8    | 2766.1                       | 38595.8 | 2370.1 |
| <b>Assignment</b>     | <i>D-band</i> | <i>G-band</i> | <i>NV<sup>0</sup></i> | <i>NDS</i> | <i>NV</i> | <i>Fluorescence from NDS</i> |         |        |
